# Supplementary material for: In silico approach for the prospecting of molecules from Cereus jamacaru (Cereeae) in the treatment of obesity and cardiovascular diseases
Source: Research Square preprint supplement (doi:10.21203/rs.3.rs-5961003/v1), 2025-02-19
Supplement: Supplementary file 1 [file 8e2ca56e15806ea4edf82e7c.xlsx]

## Sheet: TableS1
Table S1. Summary of transcript interactions with substrates and protein residues, including energy values (Kcal/mol), functional annotations, and key residues involved in binding with triglycerides formed by Lauric, Myristic, and Palmitic acids.
Transcript ID	Energia (Kcal/mol)			Average	Functional annotation				Interaction among substrtaes an protein resideus
	Lauric	Myristic	Palmitic		PDB	nr	uniprot	kegg	Palmitic	Myristic	Lauric
T97361	-7.603	-7.178	-7.632	-7.603	4cuo_A_mol:protein_length:306__BANYAN_PEROXIDASE	peroxidase A2-like	Peroxidase A2	E1.11.1.7; peroxidase [EC:1.11.1.7]	ARG 91, HIS 222, HIS 289, PRO 192, SER 219, TYR 285	ARG 91, ASN 248, GLY 193, HIS 222, PRO 192, PRO 194, SER 219, TRP 235	HIS'222, GLY 193, PRO 192, PRO 194, SER 219
T6778	-7.475	-7.394	-7.479	-7.475	7ksc_D_mol:protein_length:93__Non-specific_lipid-transfer_protein	non-specific lipid-transfer protein 1	Non-specific lipid-transfer protein Lac s 1	-	ARG 74, ASP 112, CYS 78, ILE 61, PRO 113, SER 65	ARG 74, CYS 78, SER 65, VAL 77	ARG 74, GLN 121, ILE 61, LEU 64, LYS 110, SER 65
T91586	-7.102	-7.752	-7.304	-7.304	1un1_B_mol:protein_length:278__XYLOGLUCAN_ENDOTRANSGLYCOSYLASE	putative xyloglucan endotransglucosylase/hydrolase B	Probable xyloglucan endotransglucosylase	-	ASP 142, GLY 143, HIS 140, ILE 141, LEU 70, MET 104, SER 68, THR 66,TRP 71, TYR 67, VAL 69	ASP 142, CYS 144, HIS 140, ILE 141, LEU 70, LYS 137, MET 104, PHE 139, SER 68, TRP 71, TYR 67, VAL 69	ASP 142, HIS 140, HIS 65, ILE 141, LYS 137, PHE 139, SER 68, THR 66, TRP 71, TYR 67, VAL 69
T97353	-7.425	-7.063	-7.484	-7.425	4cuo_A_mol:protein_length:306__BANYAN_PEROXIDASE	peroxidase A2-like	Peroxidase 53	E1.11.1.7; peroxidase [EC:1.11.1.7]	ARG 91, ASN 248, GLY 193, HIS 222, HIS 289, HIS 95, LEU 191, LYS 228, PRO 121, PRO 122, PRO 192, PRO 194, SER 126, TYR 285	HIS 222, PRO 192, PRO 194, SER 219, TYR 285	ARG 91, GLY 193, HIS 222, HIS 95, PHE 196, PRO 192, PRO 194, SER 219
T97368	-7.386	-6.933	-7.561	-7.386	4cuo_A_mol:protein_length:306__BANYAN_PEROXIDASE	peroxidase A2-like	Peroxidase A2	E1.11.1.7; peroxidase [EC:1.11.1.7]	ALA 87, ARG 226, ARG 91, GLY 193, HIS 222, PRO 192, PRO 194	ARG 91, HIS 222, SER 219	ARG 91, GLY 193, HIS 222, HIS 95, LEU 218, PRO 192, PRO 194, SER 219
T32032	-7.243	-7.563	-7.007	-7.243	4i94_B_mol:protein_length:300__Probable_serine/threonine-protein_kinase_At5g41260	serine/threonine-protein kinase BSK5	Serine/threonine-protein kinase BSK5	-	ASP 41, GLU 154, GLU 182, HIS 153, PHE 173, SER 178, THR 177, THR 183, TRP 176, TYR 33	ASP 41, GLN 174, HIS 153, PHE 173, SER 178, THR 177, TRP 176	ASP 158, ASP 41, GLN 174, GLU 182, HIS 153, PHE 173, SER 178, THR 177,TRP 176, TYR 161, TYR 33
T71866	-7.26	-7.079	-7.414	-7.26	2p5r_B_mol:protein_length:170__Glutathione_peroxidase_5	glutathione peroxidase 1	Probable phospholipid hydroperoxide glutathione	-	ASN 24, ASN 84, CYS 23, PHE 21, PRO 22, TYR 1	ALA 20, ASN 84, GLU 86, LEU 19, LYS 87, PHE 21, PHE 85, PHE 88, PRO 22, TRP 83, TYR 1, TYR 66	ALA 20, ASN 84, CYS 23, GLU 86, LEU 19, PHE 21, PHE 85, PHE 88, PRO 22, TRP 83, TYR 1, TYR 66
T95165	-7.315	-7.351	-6.896	-7.315	4ka7_A_mol:protein_length:714__Oligopeptidase_A	Organellar oligopeptidase A, chloroplastic/mitochondrial	Organellar oligopeptidase A	-	ASN 38, ILE 39, SER 74, TYR 27, TYR 75	ALA 70, ASN 38, GLU 71, ILE 39, SER 74, TYR 27, TYR 67, TYR 75	ALA 70, ILE 39, SER 74, TYR 27 ,TYR 75
T89423	-7.782	-6.914	-6.805	-6.914	2q4w_A_mol:protein_length:524__Cytokinin_dehydrogenase_7	cytokinin dehydrogenase 7-like	Cytokinin dehydrogenase 11	CKX; cytokinin dehydrogenase [EC:1.5.99.12]	ALA 363, ARG 243, ARG 359, GLU 314, PRO 408, SER 288, VAL 283	ALA 363, ARG 243, ARG 359, ASP 159, GLU 272, GLU 314, PRO 287, SER 288, VAL 360	ALA 363, ARG 243, ARG 359, GLU 314, VAL 360
T34231	-7.292	-7.208	-6.922	-7.208	7sox_P_mol:protein_length:514__EH_domain-containing_protein_4	EH domain-containing protein 1-like	EH domain-containing protein 1	EHD1; EH domain-containing protein 1	ILE 52, LEU 84, LEU 86, THR 50, THR 54, THR 75	ASP 83, ILE 52, LEU 84, LEU 86, LEU 87, LEU 88, THR 50, THR 54, VAL 57	ILE 52, LEU 86, LEU 87, LEU 88, THR 54, THR 75, VAL 57
T106253	-6.967	-7.076	-7.241	-7.076	4c2x_A_mol:protein_length:410__GLYCYLPEPTIDE_N-TETRADECANOYLTRANSFERASE_2	glycylpeptide N-tetradecanoyltransferase 1	Glycylpeptide N-tetradecanoyltransferase 1	-	ASN 128, LEU 130, LEU 380, PHE 129, THR 164, TYR 62, TYR 74, VAL 127	ALA 165, ASN 128, LEU 130, LEU 380, PHE 129, THR 164, TYR 62, TYR 74, VAL 127	ASN 128, GLY 166, LEU 130, LEU 380, PHE 129, THR 164, TYR 62, TYR 74, VAL 127
T106634	-7.134	-6.984	-7.139	-7.134	2j5x_B_mol:protein_length:175__ADP-RIBOSYLATION_FACTOR_6	ADP-ribosylation factor family-domain-containing protein	ADP-ribosylation factor 6	-	ASN 9, ASP 12, GLY 32, THR 30, TRP 11, VAL 13, VAL 34	ASN 9, GLY 32, THR 30, TRP 11, TRP 23, TYR 26, VAL 10, VAL 34	ASN 9, ASP 12, GLY 32, THR 30, TRP 11, TRP 23, VAL 10, VAL 13, VAL 34, VAL 36
T71498	-6.876	-6.94	-7.346	-6.94	7d5k_C_mol:protein_length:1042__Cellulose_synthase	cellulose synthase A catalytic subunit 3	Cellulose synthase A catalytic subunit 7	-	ARG 174, ASN 175, ASN 241, GLU 176, GLY 244, ILE 240, LEU 237, PHE 178, VAL 245	ALA 270, ASN 241, GLY 244, LEU 237, LYS 266, PHE 178, TRP 179, VAL 245	ARG 174, ASN 175, GLU 176, PHE 269
T30537	-7.115	-6.849	-7.109	-7.109	7d6b_B_mol:protein_length:482__Beta-glucosidase_18	beta-glucosidase 46-like isoform X2	Beta-glucosidase 18	-	ALA 88, ARG 30, ASN 32, GLU 29, GLY 85, LYS 28, PHE 87, TRP 89, TYR 31, TYR 65, TYR 86	ARG 30, ASN 32, GLU 29, PHE 87, TRP 89, TYR 31, TYR 65, TYR 86	ALA 88, ARG 30, ASN 32, GLU 29, GLY 85, LYS 28, PHE 87, TRP 89, TYR 31, TYR 65, TYR 86
T106254	-7.462	-6.631	-6.93	-6.93	4c2x_A_mol:protein_length:410__GLYCYLPEPTIDE_N-TETRADECANOYLTRANSFERASE_2	glycylpeptide N-tetradecanoyltransferase 1	Glycylpeptide N-tetradecanoyltransferase 1	NMT; glycylpeptide N-tetradecanoyltransferase [EC:2.3.1.97]	ALA 219, ASN 182, ASP 119, ASP 120, ASP 408, GLU 118, GLY 409, LEU 434, THR 218, TYR 116	ALA 219, ASN 182, LEU 184, LEU 434, PHE 183, THR 218, TYR 116	ALA 219, ,ASN 182, GLY 220, THR 218, TYR 116
T70453	-7.052	-7.117	-6.849	-7.052	1apx_D_mol:protein_length:249__CYTOSOLIC_ASCORBATE_PEROXIDASE	L-ascorbate peroxidase, cytosolic-like	Probable L-ascorbate peroxidase 4	E1.11.1.11; L-ascorbate peroxidase [EC:1.11.1.11]	ALA 134, ALA 70, ARG 38, ASP 133, HIS 42, PRO 132, SER 207	ALA 134, ALA 70, ARG 167, ARG 38, CYS 168, GLY 69, HIS 163, HIS 169, HIS 42, PRO 132, SER 173, TRP 41	ALA 70, ARG 167, ARG 38, CYS 168, GLY 162, HIS 169, HIS 42, LEU, 165, LEU 35, PRO 34, SER 173
T34256	-7.074	-6.881	-7.048	-7.048	7sox_P_mol:protein_length:514__EH_domain-containing_protein_4	EH domain-containing protein 1-like	EH domain-containing protein 1	-	ASP 53, ILE 52, ILE 85, LEU 84, LEU 86, THR 54	ASP 53, ILE 52, LEU 86, LEU 88, THR 54	ASP 53, ILE 52, LEU 84, LEU 86, LEU 88, THR 54, THR 75
T108531	-7.101	-7.132	-6.748	-7.101	8efg_A_mol:protein_length:295__Deoxyribonuclease_TATDN1	putative deoxyribonuclease TATDN1	Deoxyribonuclease TATDN1	-	ALA 211, ASP 210, ILE 32, THR 209, THR 34	ALA 211, ARG 30, ASN 29, ASP 210, ILE 32, THR 209, THR 34	ALA 211, ASP 210, GLU 208, ILE 32, THR 209, THR 34
T57638	-6.838	-7.296	-6.825	-6.838	4axe_A_mol:protein_length:456__INOSITOL-PENTAKISPHOSPHATE_2-KINASE	inositol-pentakisphosphate 2-kinase-like	Inositol-pentakisphosphate 2-kinase	IPPK; inositol-pentakisphosphate 2-kinase [EC:2.7.1.158]	GLU 164, HIS 147, ILE 161, SER 148, SER 162, TYR 99, VAL 163	GLU 164, HIS 147, SER 162, TYR 99, VAL 163	ARG 17, ASN 293, GLU 164, HIS 147, ILE 161, ILE 165, SER 148, SER 162, TYR 99, VAL 163
T12141	-7.095	-6.881	-6.919	-6.919	7svq_B_mol:protein_length:343__L-galactose_dehydrogenase	L-galactose dehydrogenase	L-galactose dehydrogenase	GalDH; L-galactose dehydrogenase [EC:1.1.1.316]	ARG 93, ASP 128, GLY 273, HIS 127, LEU 271, MET 217, SER 213, SER 27, TYR 185, TYR 61, TYR 62	ARG 93, ASP 128, GLY 273, HIS 127, MET 217, SER 213, SER 27, TYR 185, TYR 62	ARG 93, ASP 128, HIS 127, SER 213, SER 27, TYR 185, TYR 61, TYR 62
T69893	-6.91	-7.177	-6.798	-6.91	3dof_A_mol:protein_length:192__ADP-ribosylation_factor-like_protein_2	ADP-ribosylation factor-like protein 2	ADP-ribosylation factor-like protein 2	ARL2; ADP-ribosylation factor-like protein 2	ASN 18, ASP 21, GLY 41, ILE 43, THR 39, TRP 20, TYR 35	ASN 18, ASP 21, GLY 41, ILE 43, TRP 20, TRP 32, TYR 35, VAL 19, VAL 45	ASN 18, ASP 21, GLY 24, GLY 41, ILE 43, TRP 20, VAL 19, VAL 22, VAL 45
T112236	-6.844	-6.931	-7.039	-6.931	4bc5_C_mol:protein_length:538__XYLULOSE_KINASE	xylulose kinase-like	Xylulose kinase 2	-	LEU 13, LEU 77, PRO 17, SER 12, SER 16, SER 76, THR 72, VAL 78	LEU 77, PRO 17, SER 16, SER 76, VAL 78	LEU 77, PRO 17 ,SER 16, SER 76, VAL 78
T34005	-6.938	-6.727	-6.998	-6.938	6yjw_B_mol:protein_length:362__O-methyltransferase	O-methyltransferase OMT3	Caffeic acid 3-O-methyltransferase	-	ALA 28, ASN 310, HIS 127, THR 123, VAL 307	ASN 310, HIS 127, LEU 122, THR 123, VAL 307	ASN 310, TYR 178, TYR 303
T34244	-7.324	-6.329	-6.925	-6.925	7sox_P_mol:protein_length:514__EH_domain-containing_protein_4	EH domain-containing protein 1-like	EH domain-containing protein 1	EHD1; EH domain-containing protein 1	ASP 34, ILE 33, LEU 67, THR 35, THR 56	ASP 34, ILE 33, LEU 67, LEU 69, PRO 36, THR 35, VAL 38	ASP 34, ILE 33, LEU 67, LEU 69, THR 35
T34221	-7.017	-6.614	-6.897	-6.897	7sox_P_mol:protein_length:514__EH_domain-containing_protein_4	EH domain-containing protein 1 isoform X2	EH domain-containing protein 1	EHD1; EH domain-containing protein 1	ASP 34, ILE 33, LEU 65, LEU 67, LEU 69, THR 35	ASP 34, ILE 33, LEU 67, LEU 69, THR 35	ASP 34, ILE 33, ILE 66, LEU 65, LEU 67, LEU 69, PRO 36, THR 35, VAL 38
T16234	-6.901	-6.695	-6.882	-6.882	1yp4_D_mol:protein_length:451__Glucose-1-phosphate_adenylyltransferase_small_subunit	glucose-1-phosphate adenylyltransferase large subunit 3	Glucose-1-phosphate adenylyltransferase large	-	ASN 10, GLN 78, LEU 15, LEU 87, LEU 89, LYS 11, TYR 13, TYR 43, VAL 12	ASP 85, ILE 88, LEU 15, LEU 87, LEU 89, LYS 11, TYR 13, TYR 43, VAL 86	ASN 10, ASP 85, ILE 14, LEU 15, LEU 75, LEU 87, LEU 89, LYS 11, TYR 13, TYR 43
T51188	-6.881	-6.694	-6.812	-6.812	4jie_A_mol:protein_length:503__Beta-mannosidase/beta-glucosidase	beta-glucosidase 44-like	Beta-glucosidase 1	bglB; beta-glucosidase [EC:3.2.1.21]	ARG 102, ASP 170, GLU 100, HIS 194, TYR 174, TYR 245	ARG 102, ASN 240, ASP 170, GLU 100, HIS 194, PHE 171, THR 243, TRP 286, TYR 242, TYR 245, TYR 55, VAL 172	ARG 102, ASP 170, GLU 100, GLU 314, HIS 194, PHE 171, TYR 174, TYR 242, TYR 245, TYR 55, VAL 172
T68060	-7.139	-6.811	-6.266	-6.811	3uet_B_mol:protein_length:478__Alpha-1.3/4-fucosidase	alpha-L-fucosidase 1 isoform X2	Putative alpha-L-fucosidase 1	-	ALA 241, ASP 369, ILE 370, LEU 242, SER 240, TYR 417, VAL 386	ALA 373, ALA 411, ARG 374, ARG 410, ASP 369, GLN 408, GLY 375, GLY 387, ILE 453, LEU 29, LEU 31, PRO 413, THR 30, THR 385, TYR 388, TYR 417, VAL 386	ALA 373, ASP 369, GLU 236, ILE 39, LEU 29, LEU 38, LYS 239, SER 40, SER 416, THR 30, THR 385, TRP 377, TYR 417, VAL 386, VAL 415
T7376	-7.233	-6.562	-6.303	-6.562	5z6q_A_mol:protein_length:392__Spastin	spastin-like	Fidgetin-like protein 1	SPAST; spastin [EC:5.6.1.1]	GLN 457, GLN 462, GLN 487, GLU 491, GLU 54, LEU 57, LYS 458, SER 56, TYR 112	GLN 457, GLN 487, LEU 57, LYS 458, SER 56, TRP 58, TYR 112	GLN 457, GLN 462 ,GLN 487, GLU 491, GLY 461, LEU 57, LYS 458, SER 56, TRP 58, TYR 112
T27043	-7.086	-6.469	-6.386	-6.469	5xr6_B_mol:protein_length:194__Ras-related_protein_RABA1a	ras-related protein Rab11D	Ras-related protein Rab11D	RAB11A; Ras-related protein Rab-11A	ALA 49, ALA 52, ASP 31, GLN 28, GLY 48, GLY 51, LEU 53, THR 32, TRP 30, TRP 70,TYR 45, VAL 50, VAL 55	ALA 49, ALA 52, ASP 31, GLN 28, GLY 51, LEU 53, TRP 30, TYR 45	GLN 28, GLY 51, ILE 29, LEU 53, TRP 30, TYR 45, TYR 46
T94624	-7.294	-6.266	-6.267	-6.267	7djj_A_mol:protein_length:667__Protein_SUPPRESSOR_OF_QUENCHING_1._chloroplastic	protein SUPPRESSOR OF QUENCHING 1	Protein SUPPRESSOR OF QUENCHING 1	-	ARG 243, ASN 610, CYS 245, GLU 244, THR 59	ARG 243, CYS 245, GLU 244, THR 59, VAL 246	ARG 243, CYS 245, GLU 244 ,THR 59, VAL 246, VAL 247
T68887	-6.821	-6.495	-6.451	-6.495	7dlh_A_mol:protein_length:337__peroxidase	peroxidase 12-like	Peroxidase 12	E1.11.1.7; peroxidase [EC:1.11.1.7]	ARG 103, ARG 204, ARG 67, HIS 206, LEU 102, PRO 98, THR 101, THR 242	ARG 103, ARG 204, ARG 67, ASN 99, GLY 205, HIS 206, PRO 98, THR 101, THR 242	ARG 103, ARG 204, ARG 67, ASN 99, GLY 205, HIS 206, LEU 102, PRO 98, THR 101, THR 242
T54604	-6.713	-6.379	-6.495	-6.495	7y11_B_mol:protein_length:299__Phosphatidylinositol/phosphatidylcholine_transfer_protein_SFH5	phosphatidylinositol/phosphatidylcholine transfer protein SFH9	Phosphatidylinositol/phosphatidylcholine	SEC14, SEC14L; phosphatidylinositol/phosphatidylcholine transfer protein	ASP 248, GLN 245, GLU 176, GLY 156, GLY 196, HIS 155, LEU 256, THR 221, TYR 157, TYR 192, VAL 175	ALA 237, ASP 248, GLN 245, GLY 156, GLY 196, HIS 155, HIS 193, LEU 177, LEU 256, LYS 204, PHE 197, THR 283, TYR 146, TYR 153, TYR 157, TYR 168, TYR 192, TYR 252, VAL 175	ASN 229, ASN 232, GLY 156, GLY 173, GLY 196, GLY 227, HIS 155, LEU 172, PHE 197, TYR 146, TYR 157, TYR 192, VAL 175, VAL 228
T105037	-6.797	-6.21	-6.487	-6.487	3ppz_B_mol:protein_length:309__Serine/threonine-protein_kinase_CTR1	serine/threonine-protein kinase CTR1	Serine/threonine-protein kinase CTR1	-	ALA 155, ALA 478, ASN 103, ASP 479, ASP 585, LEU 477, LEU 584, LYS 251, SER 682, THR 156	ALA 478, ASP 479, GLN 586, GLU 677, ILE 675, LEU 477, LEU 584	ALA 478, ASP 479, GLN 586, GLU 677, LEU 477, TYR 475, VAL 587
T82395	-6.989	-6.367	-6.116	-6.367	6avy_B_mol:protein_length:257__Acyl-protein_thioesterase_2	putative lysophospholipase 2	Acyl-protein thioesterase 1	LYPLA2; lysophospholipase II [EC:3.1.1.5]	ALA 75, GLY 77, GLY 78, GLY 82 ,ILE 17, PHE 79, TRP 2, TRP 37, VAL 76	ALA 75, GLY 77. GLY 78, ILE 17, PHE 79, TRP 2, VAL 76	ALA 83, GLY 77, GLY 78, GLY 82, PHE 79, TRP 2, TRP 37
T81863	-6.653	-6.335	-6.399	-6.399	6s7t_A_mol:protein_length:826__Dolichyl-diphosphooligosaccharide--protein_glycosyltransferase_subunit_STT3B	Dolichyl-diphosphooligosaccharide--protein glycotransferase	Dolichyl-diphosphooligosaccharide--protein	-	ASN 79, GLY 39, LEU 78, THR 36, THR 38, TRP 75, VAL 77	GLY 39, LEU 78, THR 36, THR 38	ASN 2, GLY 39, LEU 78, THR 36, THR 38, VAL 77
T81371	-6.691	-6.323	-6.221	-6.323	5a4d_H_mol:protein_length:329__PUTATIVE_QUINONE-OXIDOREDUCTASE_HOMOLOG._CHLOROPLASTIC	quinone-oxidoreductase homolog, chloroplastic	Quinone-oxidoreductase homolog	-	ALA 163, CYS 228, GLY 166, GLY 167, GLY 188, GLY 319, PRO 47, SER 165, TYR 206, VAL 168	ALA 163, CYS 228, GLY 167, GLY 319, LEU 250, PRO 47, THR 230, THR 251, VAL 168	ALA 163, CYS 228, GLY 166, GLY 167, GLY 169, GLY 319, GLY 323, PRO 47, SER 165, VAL 168
T83746	-6.534	-6.368	-6.32	-6.368	6g77_B_mol:protein_length:307__Ribosomal_protein_S6_kinase_alpha-6	serine/threonine-protein kinase AtPK2/AtPK19-like	Serine/threonine-protein kinase AtPK2/AtPK19	RPS6KB; ribosomal protein S6 kinase beta [EC:2.7.11.1]	GLY 231 , GLY 263, LEU 256, LEU 257, LYS 260, TRP 227, VAL 262	GLY 231, LEU 256, LEU 257, LYS 260, TRP 227, TRP 228, VAL 230, VAL 262	GLY 231, GLY 263, LEU 256, LEU 257, LEU 261, LYS 260, TRP 227, TRP 228, VAL 262
T106721	-6.703	-6.265	-6.245	-6.265	4jdl_C_mol:protein_length:223__Abscisic_acid_receptor_PYL5	abscisic acid receptor PYL4-like	Abscisic acid receptor PYL4	-	ALA 103 ,ARG 129, ARG 95, HIS 128, LEU 130, PHE 75, SER 105, VAL 104, VAL 96	ARG 95, HIS 128, SER 105, VAL 104, VAL 96	ALA 103, GLU 107, HIS 128, SER 105, VAL 104, VAL 96
T94516	-6.93	-6.191	-6.079	-6.191	8gzh_Z_mol:protein_length:1323__DNA-directed_RNA_polymerase_subunit_beta'	RNA polymerase beta'' subunit	DNA-directed RNA polymerase subunit beta''	rpoC; DNA-directed RNA polymerase subunit beta' [EC:2.7.7.6]	ARG 482, ARG 842, ASP 256, ASP 455, ASP 700, GLY 481, ILE 701, SER 480, THR 1163, TYR 457, TYR 613, TYR 702	ARG 242, ASP 256, ASP 445, ASP 455, ASP 700, GLU 1257, ILE 245, ILE 701, LYS 688, PRO 645, SER 444, SER 453, SER 513, SER 514, SER 515, THR 247, TRP 816, TYR 457, TYR 702, VAL 456	ARG 1072, ASP 445, ASP 455, ASP 700, GLN 1065, ILE 701, LEU 1288, LYS 688, SER 444, SER 446, SER 453, SER 480, SER 514, SER 515, TRP 452, TYR 457, TYR 702, VAL 1061
T57425	-6.85	-6.08	-6.187	-6.187	2xtz_C_mol:protein_length:354__GUANINE_NUCLEOTIDE-BINDING_PROTEIN_ALPHA-1_SUBUNIT	guanine nucleotide-binding protein alpha-2 subunit isoform X6	Guanine nucleotide-binding protein alpha-1	GNAT3; guanine nucleotide-binding protein G(t) subunit alpha 3	ALA 78, ASP 58, CYS 82, GLY 60, GLY 61, ILE 80, PHE 57, VAL 59	ALA 78, ASP 58, CYS 82, GLY 60, GLY 61, ILE 80, LEU 72, PHE 57, VAL 59	ALA 78, ARG 55, ASP 58, CYS 82, GLY 61, ILE 80, LEU 72, PHE 57, PHE 81, VAL 59
T9112	-6.555	-6.408	-6.067	-6.408	3zw6_F_mol:protein_length:293__RIBULOSE_BISPHOSPHATE_CARBOXYLASE/OXYGENASE_ACTIVASE_1._CHLOROPLASTIC	ribulose bisphosphate carboxylase/oxygenase activase	Ribulose bisphosphate carboxylase/oxygenase	-	ALA 110, ALA 69, ARG 338, ARG 47, ASN 112, ASN 337, ASN 48, ASP 138, ASP 65, ASP 96, GLN 155, GLN 335, GLU 339, GLU 93, GLY 156, TYR 153	ALA 108, ARG 47, ASN 337, ASN 48, ASP 101, ASP 96, GLN 335, GLU 339, GLY 99, LYS 95, PHE 49	ARG 47, ASN 100, ASN 337, ASP 96, GLN 155, GLN 335, GLY 99, LYS 95
T16239	-6.564	-6.188	-6.173	-6.188	1yp4_D_mol:protein_length:451__Glucose-1-phosphate_adenylyltransferase_small_subunit	glucose-1-phosphate adenylyltransferase large subunit	Glucose-1-phosphate adenylyltransferase large	-	ASP 85, HIS 106, ILE 88, LEU 87, SER 116, SER 90, THR 114, VAL 86	ASP 85, GLU 84, GLY 91, HIS 93, ILE 88, LEU 15, LEU 87, LEU 89, SER 116, SER 90, THR 114, TYR 95, VAL 86	ASP 85, GLN 192, LEU 87, LYS 11, TYR 99, VAL 86
T104994	-6.757	-6.071	-6.052	-6.071	7wnq_C_mol:protein_length:556__Guard_cell_S-type_anion_channel_SLAC1	S-type anion channel SLAH2-like	S-type anion channel SLAH3	SLAC1, SLAH; S-type anion channel	GLU 208, GLU 209, GLU 89, LEU 210, MET 211, PRO 88, HR 87	GLU 208, SER 236, SER 237, THR 251	GLU 208, GLU 209, MET 211, SER 236, SER 237
T91583	-6.645	-6.142	-6.082	-6.142	3jcu_y_mol:protein_length:267__Chlorophyll_a-b_binding_protein._chloroplastic	chlorophyll A-B binding protein (CAB), putative	Chlorophyll a-b binding protein 40	LHCB1; light-harvesting complex II chlorophyll a/b binding protein 1	ASN 255, ASN 256, GLY 129, GLY 137, LYS 268, TRP 133, TRP 258, TYR 260	ALA 136, ALA 261, ASN 255, ASN 256, GLY 137, LYS 268, PRO 266, TRP 133, TRP 258, TYR 260	ALA 261, ASN 255, ASN 256, GLY 137, LYS 268, PRO 266, TRP 133, TRP 258, TYR 260, VAL 265
T83824	-6.518	-6.26	-6.068	-6.26	7mku_B_mol:protein_length:329__Enoyl-CoA_hydratase_2._peroxisomal	enoyl-CoA hydratase 2, peroxisomal-like	Enoyl-CoA hydratase 2	ECH2; peroxisomal enoyl-CoA hydratase 2 [EC:4.2.1.119]	ARG 157, ARG 93, ASN 212, ASP 210, ASP 77, HIS 266, HIS 97, LEU 264, LEU 265, LEU 94, LEU 95, LEU 96, PRO 92	ASN 212, ASP 210, GLY 233, HIS 215, HIS 97, LEU 231, LEU 234	ASN 212, ASP 210, GLY 233, HIS 215, HIS 232, HIS 97, LEU 231, LEU 265, LEU 95
T50132	-6.714	-6.06	-6.04	-6.06	6ppe_3_mol:protein_length:369__ATP-dependent_Clp_protease_ATP-binding_subunit_ClpX	CLP protease regulatory subunit CLPX1	CLP protease regulatory subunit CLPX2	-	ARG 252, ASN 334, ASN 495, ASP 167, CYS 419, GLU 249, GLU 604, GLY 420, GLY 421, ILE 250	ASN 334, ASP 167, GLU 249, GLU 604, GLY 420, GLY 421, ILE 250, LYS 248, VAL 333	ARG 252, ASN 334, ASP 167, GLU 604, GLY 420, GLY 421, VAL 333
T40192	-6.444	-6.151	-6.176	-6.176	5jo7_D_mol:protein_length:538__Vetispiradiene_synthase_1	Germacrene-D synthase	Terpene synthase 1	-	GLN 69, GLU 26, GLU 35, GLY 71, LYS 81, TYR 72	ARG 27, GLN 69, GLU 26, GLU 35, GLY 71, ILE 74, LYS 81, TRP 99, TYR 32, TYR 72	ALA 31, GLN 69, GLU 26, GLU 35, GLY 29, TRP 99, TYR 32, TYR 72
T63818	-6.444	-6.1	-6.184	-6.184	7l34_A_mol:protein_length:647__DNA_ligase_1	DNA ligase 1	DNA ligase 1	-	ARG 6, GLY 155, HIS 213, LEU 188, LEU 228, PHE 158, SER 227, SER 247, SER 248, THR 156, THR 246, TYR 182	ALA 215, ARG 214, GLN 149, HIS 213, SER 248, TYR 182	ARG 214, GLN 149, HIS 213, ILE 226, THR 246
T36912	-6.523	-6.225	-5.975	-6.225	7swq_A_mol:protein_length:988__Protein_argonaute_10	protein argonaute 5	Protein argonaute 1C	-	ARG 19, GLU 20, GLU 21, ILE 62, PHE 63, PHE 64	ARG 19, GLU 21, ILE 62, PHE 64	ARG 19, GLU 21, ILE 62, PHE 63, PHE 64
T101818	-6.496	-6.203	-6.01	-6.203	3sv0_A_mol:protein_length:483__Casein_kinase_I-like	casein kinase	Casein kinase	CSNK1E; casein kinase 1, epsilon [EC:2.7.11.1]	ASP 132, ASP 91, GLU 52, GLY 18, GLY 21, ILE 15, LYS 38, SER 17, SER 88, TYR 56	ASP 132, ASP 91, GLU 52, GLY 16, GLY 18, ILE 15, LYS 38, SER 17, SER 88, TYR 56	ASP 132, ASP 91, GLY 18, GLY 86, ILE 15, LEU 85, PRO 87, SER 17, SER 88
T106714	-6.562	-6.068	-6.079	-6.079	4jdl_C_mol:protein_length:223__Abscisic_acid_receptor_PYL5	abscisic acid receptor PYL4-like	Abscisic acid receptor PYL4	PYL; abscisic acid receptor PYR/PYL family	ALA 103, ARG 129, ARG 95, HIS 128, LEU 130, PHE 75, SER 105, VAL 104, VAL 96	ARG 129, HIS 128, LEU 130, SER 105, VAL 104	GLU 107, HIS 128, PHE 75, SER 105
T9903	-6.372	-6.039	-6.11	-6.11	1wfj_A_mol:protein_length:136__putative_elicitor-responsive_gene	elicitor-responsive protein 3	Probable ADP-ribosylation factor GTPase-activati	-	ALA 25, ASN 29, GLU 91, ILE 94, LYS 27, LYS 93, PRO 26, THR 24, TRP 28	ALA 25, ASN 29, GLU 30, GLU 91, ILE 92, LYS 27, LYS 93, PRO 26, SER 95, THR 24	ALA 25, GLU 30, GLU 91, ILE 92, ILE 94, LYS 27, LYS 93, PRO 26, SER 95, THR 24, TRP 28
T66635	-6.473	-6.159	-5.879	-6.159	6ttj_L_mol:protein_length:551__Alkaline/neutral_invertase_CINV1	probable alkaline/neutral invertase D	Neutral/alkaline invertase 1	-	ARG 49, ARG 65, ASP 60, GLY 61, GLY 64, LEU 22, LEU 23, LEU 63, LYS 62, TYR 59, VAL 21	ALA 42, ALA 46, GLU 57, GLY 61, LEU 22, TYR 58, TYR 59, VAL 21	GLU 57, GLY 64, LEU 22, LEU 23, LEU 63, PRO 56, TYR 58, TYR 59, VAL 21
T64190	-6.34	-6.151	-5.998	-6.151	1zd9_A_mol:protein_length:188__ADP-ribosylation_factor-like_10B	ADP-ribosylation factor-like protein 8a	ADP-ribosylation factor-like protein 8	ARL8; ADP-ribosylation factor-like protein 8	LEU 20, LYS 19, TRP 21, VAL 44, VAL 46	ALA 42, ILE 43, LEU 20, LYS 19, TRP 21, VAL 44, VAL 46	ALA 42, ILE 43, LEU 20, LYS 19, TRP 21, VAL 44, VAL 46
T102619	-6.442	-6.035	-6.005	-6.035	5yjl_D_mol:protein_length:310__Glutamyl-tRNA_reductase-binding_protein	glutamyl-tRNA reductase-binding protein	Glutamyl-tRNA reductase-binding protein	-	GLN 62, ILE 35, LEU 36, LYS 33, MET 1, PRO 34	GLN 62, ILE 35, LYS 33, MET 1, PRO 34	GLN 62, LYS 33, MET 1, PRO 14, PRO 34, SER 15, VAL 242
T73029	-6.338	-5.992	-6.13	-6.13	1efp_C_mol:protein_length:307__PROTEIN_(ELECTRON_TRANSFER_FLAVOPROTEIN)	Acryloyl-CoA reductase (NADH) protein	Electron transfer flavoprotein subunit alpha	-	ALA 15, ALA 19, GLY 14, GLY 47, HIS 54, LEU 44, PHE 46, THR 16, TYR 43, VAL 48	ALA 15, ALA 18, ALA 19, GLY 14, GLY 47, PHE 46, THR 16, ]VAL 48	ALA 15, ALA 19, GLY 14, GLY 47, PHE 46, THR 16, TYR 43, VAL 48
T19499	-6.279	-6.162	-5.859	-6.162	5lrb_B_mol:protein_length:938__Alpha-1.4_glucan_phosphorylase	alpha-1,4 glucan phosphorylase L-2 isozyme	Alpha-1,4 glucan phosphorylase L-2 isozyme	-	ASP 109, GLN 34, GLU 54	ASP 109, GLN 34, GLU 54	ASP 109, GLN 34, PRO 108
T57423	-6.263	-5.894	-5.936	-5.936	2xtz_C_mol:protein_length:354__GUANINE_NUCLEOTIDE-BINDING_PROTEIN_ALPHA-1_SUBUNIT	guanine nucleotide-binding protein alpha-1 subunit	Guanine nucleotide-binding protein alpha-1	GNAT3; guanine nucleotide-binding protein G(t) subunit alpha 3	ASN 165, ASP 162, ASP 290, CYS 163, GLU 169, LYS 294, TYR 166, TYR 188	ASN 165, ASP 162, ASP 290, CYS 163, TYR 152, TYR 166, TYR 188	ASN 165, ASP 162, ASP 290, CYS 163, ILE 291, TYR 166, TYR 188
